# Supplementary material for: The Impact of Caring and Killing on Physiological and Psychometric Measures of Stress in Animal Shelter Employees: A Pilot Study
Source: PubMed Central journal article supplement (PMC7764342; doi:10.3390/ijerph17249196), 2020-12-09
Supplement: ijerph-17-09196-s001.pdf [file ijerph-17-09196-s001.pdf]

**Table S1.** Experiment 1 Analysis.

| Variable                                        | Df | Sum Sq  | Mean Sq | Estimate | Std. Error | F value | Pr(>F) | Significance |
|-------------------------------------------------|----|---------|---------|----------|------------|---------|--------|--------------|
| <b>Burnout</b>                                  |    |         |         |          |            |         |        |              |
| Original Model                                  |    |         |         |          |            |         |        |              |
| Contact with animals                            | 1  | 114.679 | 114.679 | -1.591   | 2.131      | 8.962   | 0.017  | *            |
| Gender                                          | 1  | 76.902  | 76.902  | -4.468   | 2.419      | 6.009   | 0.040  | *            |
| Age                                             | 1  | 0.174   | 0.174   | 1.603    | 4.474      | 0.014   | 0.910  |              |
| Smoke                                           | 1  | 38.785  | 38.785  | 3.225    | 3.636      | 3.031   | 0.120  |              |
| Married                                         | 1  | 57.927  | 57.927  | -8.404   | 3.309      | 4.527   | 0.066  |              |
| Spiritual                                       | 1  | 192.529 | 192.529 | -7.875   | 6.273      | 15.045  | 0.005  | **           |
| Job                                             | 2  | 185.510 | 92.755  | -12.801  | 8.876      | 7.248   | 0.016  | *            |
| Pets                                            | 1  | 57.422  | 57.422  | -4.012   | 5.243      | 4.487   | 0.067  |              |
| Months on the job                               | 1  | 0.311   | 0.311   | 0.008    | 0.031      | 0.024   | 0.880  |              |
| Total euthanasias/<br>harvest performed         | 1  | 0.009   | 0.009   | -0.113   | 2.049      | 0.001   | 0.980  |              |
| Average number<br>of euthanasias per<br>session | 1  | 1.465   | 1.465   | 0.014    | 0.110      | 0.114   | 0.744  |              |
| Frequency of<br>euthanasia                      | 1  | 1.186   | 1.186   | 0.469    | 1.541      | 0.093   | 0.769  |              |
| Residuals                                       | 8  | 102.374 | 12.797  | NA       | NA         | NA      | NA     |              |
| Reduced Model                                   |    |         |         |          |            |         |        |              |
| Contact with animals                            | 1  | 130.719 | 130.719 | -1.695   | 0.745      | 12.408  | 0.003  | *            |
| Gender                                          | 1  | 70.131  | 70.131  | -3.917   | 1.537      | 6.657   | 0.019  | *            |
| Age                                             | 1  | 24.029  | 24.029  | 5.335    | 2.064      | 2.281   | 0.149  |              |
| Married                                         | 1  | 74.731  | 74.731  | -8.741   | 1.975      | 7.093   | 0.016  | ***          |
| Spiritual                                       | 1  | 262.158 | 262.158 | -9.198   | 2.899      | 24.884  | 0.000  | **           |
| Job                                             | 2  | 162.179 | 81.089  | -15.215  | 3.273      | 7.697   | 0.004  | ***          |
| Pets                                            | 1  | 76.340  | 76.340  | -6.253   | 2.323      | 7.246   | 0.015  | **           |
| Residuals                                       | 17 | 179.099 | 10.535  | NA       | NA         | NA      | NA     |              |
| <b>Compassion satisfaction</b>                  |    |         |         |          |            |         |        |              |
| Original Model                                  |    |         |         |          |            |         |        |              |
| Contact with animals                            | 1  | 63.789  | 63.789  | 0.512    | 2.564      | 3.443   | 0.101  |              |
| Gender                                          | 1  | 3.582   | 3.582   | 2.402    | 2.911      | 0.193   | 0.672  |              |
| Age                                             | 1  | 0.006   | 0.006   | -6.509   | 5.383      | 0.000   | 0.986  |              |
| Smoke                                           | 1  | 0.363   | 0.363   | 0.071    | 4.375      | 0.020   | 0.892  |              |
| Married                                         | 1  | 122.948 | 122.948 | 13.397   | 3.982      | 6.636   | 0.033  | *            |
| Spiritual                                       | 1  | 121.957 | 121.957 | 4.053    | 7.548      | 6.583   | 0.033  | *            |
| Job                                             | 2  | 66.407  | 33.203  | 5.459    | 10.680     | 1.792   | 0.227  |              |
| Pets                                            | 1  | 156.463 | 156.463 | 5.202    | 6.308      | 8.445   | 0.020  | *            |
| Months on the job                               | 1  | 1.486   | 1.486   | -0.008   | 0.038      | 0.080   | 0.784  |              |

|                                                 |    |         |         |         |        |       |          |
|-------------------------------------------------|----|---------|---------|---------|--------|-------|----------|
| Total euthanasias/<br>harvest performed         | 1  | 3.722   | 3.722   | -1.058  | 2.465  | 0.201 | 0.666    |
| Average number<br>of euthanasias per<br>session | 1  | 15.652  | 15.652  | -0.069  | 0.133  | 0.845 | 0.385    |
| Frequency of<br>euthanasia                      | 1  | 4.500   | 4.500   | -0.914  | 1.854  | 0.243 | 0.635    |
| Residuals                                       | 8  | 148.215 | 18.527  | NA      | NA     | NA    | NA       |
| <b>Reduced Model</b>                            |    |         |         |         |        |       |          |
| Married                                         | 1  | 28.017  | 28.017  | 5.757   | 2.031  | 1.535 | 0.228    |
| Job                                             | 2  | 143.046 | 71.523  | 8.601   | 2.256  | 3.918 | 0.035 *  |
| Pets                                            | 1  | 147.996 | 147.996 | 7.614   | 2.674  | 8.107 | 0.009 ** |
| Residuals                                       | 22 | 401.608 | 18.255  | NA      | NA     | NA    | NA       |
| <b>Secondary traumatic stress</b>               |    |         |         |         |        |       |          |
| <b>Original Model</b>                           |    |         |         |         |        |       |          |
| Contact with<br>animals                         | 1  | 30.683  | 30.683  | 1.246   | 2.927  | 1.272 | 0.292    |
| Gender                                          | 1  | 0.031   | 0.031   | 0.710   | 3.322  | 0.001 | 0.972    |
| Age                                             | 1  | 6.660   | 6.660   | -6.661  | 6.143  | 0.276 | 0.614    |
| Smoke                                           | 1  | 102.531 | 102.531 | 7.311   | 4.993  | 4.249 | 0.073    |
| Married                                         | 1  | 0.601   | 0.601   | -7.520  | 4.544  | 0.025 | 0.879    |
| Spiritual                                       | 1  | 88.693  | 88.693  | 3.229   | 8.614  | 3.676 | 0.092    |
| Job                                             | 2  | 162.290 | 81.145  | -5.354  | 12.189 | 3.363 | 0.087    |
| Pets                                            | 1  | 86.528  | 86.528  | -0.022  | 7.199  | 3.586 | 0.095    |
| Months on the job                               | 1  | 21.284  | 21.284  | 0.054   | 0.043  | 0.882 | 0.375    |
| Total euthanasias/<br>harvest performed         | 1  | 9.188   | 9.188   | 3.067   | 2.813  | 0.381 | 0.554    |
| Average number<br>of euthanasias per<br>session | 1  | 6.164   | 6.164   | 0.133   | 0.151  | 0.255 | 0.627    |
| Frequency of<br>euthanasia                      | 1  | 17.637  | 17.637  | -1.809  | 2.116  | 0.731 | 0.417    |
| Residuals                                       | 8  | 193.028 | 24.129  | NA      | NA     | NA    | NA       |
| <b>Reduced Model</b>                            |    |         |         |         |        |       |          |
| Total euthanasias/<br>harvest performed         | 1  | 183.690 | 183.693 | 2.776   | 1.100  | 6.373 | 0.019 *  |
| Residuals                                       | 22 | 634.140 | 28.825  | NA      | NA     | NA    | NA       |
| <b>Impact of event scale score</b>              |    |         |         |         |        |       |          |
| <b>Original Model</b>                           |    |         |         |         |        |       |          |
| Contact with<br>animals                         | 1  | 428.522 | 428.522 | 2.369   | 4.892  | 6.358 | 0.036 *  |
| Gender                                          | 1  | 99.132  | 99.132  | -8.261  | 5.552  | 1.471 | 0.260    |
| Age                                             | 1  | 218.139 | 218.139 | -25.309 | 10.268 | 3.236 | 0.110    |
| Smoke                                           | 1  | 387.435 | 387.435 | 11.112  | 8.345  | 5.748 | 0.043 *  |
| Married                                         | 1  | 9.118   | 9.118   | -9.984  | 7.594  | 0.135 | 0.723    |
| Spiritual                                       | 1  | 176.583 | 176.583 | 6.794   | 14.397 | 2.620 | 0.144    |

|                                                 |    |          |          |         |        |        |       |     |
|-------------------------------------------------|----|----------|----------|---------|--------|--------|-------|-----|
| Job                                             | 2  | 744.446  | 372.223  | 19.628  | 20.372 | 5.522  | 0.031 | *   |
| Pets                                            | 1  | 335.239  | 335.239  | 14.794  | 12.032 | 4.974  | 0.056 |     |
| Months on the job                               | 1  | 3.637    | 3.637    | 0.125   | 0.072  | 0.054  | 0.822 |     |
| Total euthanasias/<br>harvest performed         | 1  | 5.533    | 5.533    | 0.437   | 4.702  | 0.082  | 0.782 |     |
| Average number<br>of euthanasias per<br>session | 1  | 828.204  | 828.204  | 0.517   | 0.253  | 12.287 | 0.008 | **  |
| Frequency of<br>euthanasia                      | 1  | 214.782  | 214.782  | 6.313   | 3.537  | 3.186  | 0.112 |     |
| Residuals                                       | 8  | 539.231  | 67.404   | NA      | NA     | NA     | NA    |     |
| Reduced Model                                   |    |          |          |         |        |        |       |     |
| Contact with<br>animals                         | 1  | 1164.735 | 1164.735 | 5.999   | 1.532  | 10.012 | 0.005 | **  |
| Age                                             | 1  | 21.278   | 21.278   | -17.723 | 8.098  | 0.183  | 0.674 |     |
| Smoke                                           | 1  | 73.433   | 73.433   | 17.102  | 7.468  | 0.631  | 0.437 |     |
| Married                                         | 1  | 707.383  | 707.383  | -19.205 | 5.508  | 6.081  | 0.024 | *   |
| Spiritual                                       | 1  | 123.191  | 123.191  | 27.664  | 12.113 | 1.059  | 0.317 |     |
| Months on the job                               | 1  | 1490.954 | 1490.954 | 0.144   | 0.041  | 12.816 | 0.002 | **  |
| Average number<br>of euthanasias per<br>session | 1  | 1548.920 | 1548.920 | 0.652   | 0.179  | 13.315 | 0.002 | **  |
| Residuals                                       | 18 | 2093.989 | 116.333  | NA      | NA     | NA     | NA    |     |
| Change in heart rate                            |    |          |          |         |        |        |       |     |
| Original Model                                  |    |          |          |         |        |        |       |     |
| Contact with<br>animals                         | 1  | 1555.536 | 1555.536 | 6.390   | 12.733 | 5.032  | 0.075 |     |
| Gender                                          | 1  | 0.969    | 0.969    | 4.521   | 15.984 | 0.003  | 0.958 |     |
| Age                                             | 1  | 77.436   | 77.436   | -14.772 | 35.050 | 0.251  | 0.638 |     |
| Smoke                                           | 1  | 283.818  | 283.818  | -0.050  | 19.821 | 0.918  | 0.382 |     |
| Married                                         | 1  | 68.311   | 68.311   | 7.000   | 19.349 | 0.221  | 0.658 |     |
| Spiritual                                       | 1  | 215.444  | 215.444  | 14.865  | 34.788 | 0.697  | 0.442 |     |
| Job                                             | 2  | 672.107  | 336.053  | 44.365  | 52.308 | 1.087  | 0.405 |     |
| Pets                                            | 1  | 443.087  | 443.087  | 22.730  | 32.515 | 1.433  | 0.285 |     |
| Months on the job                               | 1  | 13.501   | 13.501   | 0.060   | 0.210  | 0.044  | 0.843 |     |
| Total euthanasias/<br>harvest performed         | 1  | 0.185    | 0.185    | 1.319   | 10.790 | 0.001  | 0.981 |     |
| Average number<br>of euthanasias per<br>session | 1  | 6.089    | 6.089    | 0.153   | 0.711  | 0.020  | 0.894 |     |
| Frequency of<br>euthanasia                      | 1  | 9.600    | 9.600    | -1.436  | 8.148  | 0.031  | 0.867 |     |
| Residuals                                       | 5  | 1545.515 | 309.103  | NA      | NA     | NA     | NA    |     |
| Reduced Model                                   |    |          |          |         |        |        |       |     |
| Job                                             | 2  | 2716.606 | 1358.303 | 27.762  | 5.087  | 12.535 | 0.000 | *** |
| Pets                                            | 1  | 594.825  | 594.825  | 14.597  | 6.230  | 5.489  | 0.032 | *   |

|                                                 |    |          |         |         |        |       |          |
|-------------------------------------------------|----|----------|---------|---------|--------|-------|----------|
| Residuals                                       | 17 | 1842.201 | 108.365 | NA      | NA     | NA    | NA       |
| Change in systolic pressure                     |    |          |         |         |        |       |          |
| Original Model                                  |    |          |         |         |        |       |          |
| Contact with animals                            | 1  | 132.901  | 132.901 | 7.704   | 4.271  | 3.754 | 0.101    |
| Gender                                          | 1  | 7.784    | 7.784   | 7.705   | 5.032  | 0.220 | 0.656    |
| Age                                             | 1  | 0.102    | 0.102   | -7.194  | 9.293  | 0.003 | 0.959    |
| Smoke                                           | 1  | 89.108   | 89.108  | 4.126   | 6.070  | 2.517 | 0.164    |
| Married                                         | 1  | 127.681  | 127.681 | 7.315   | 6.087  | 3.606 | 0.106    |
| Spiritual                                       | 1  | 151.339  | 151.339 | 2.896   | 10.784 | 4.275 | 0.084    |
| Job                                             | 2  | 119.319  | 59.660  | 26.213  | 19.532 | 1.685 | 0.263    |
| Pets                                            | 1  | 61.868   | 61.868  | 15.989  | 9.132  | 1.748 | 0.234    |
| Months on the job                               | 1  | 0.391    | 0.391   | 0.067   | 0.065  | 0.011 | 0.920    |
| Total euthanasias/<br>harvest performed         | 1  | 7.097    | 7.097   | 4.588   | 3.893  | 0.200 | 0.670    |
| Average number<br>of euthanasias per<br>session | 1  | 85.275   | 85.275  | 0.382   | 0.196  | 2.409 | 0.172    |
| Frequency of<br>euthanasia                      | 1  | 49.665   | 49.665  | -3.360  | 2.837  | 1.403 | 0.281    |
| Residuals                                       | 6  | 212.420  | 35.403  | NA      | NA     | NA    | NA       |
| Reduced Model                                   |    |          |         |         |        |       |          |
| Married                                         | 1  | 303.600  | 303.601 | 6.062   | 2.507  | 8.542 | 0.008 ** |
| Average number<br>of euthanasias per<br>session | 1  | 245.930  | 245.926 | 0.182   | 0.069  | 6.919 | 0.016 *  |
| Residuals                                       | 21 | 746.430  | 35.544  | NA      | NA     | NA    | NA       |
| Change in diastolic pressure                    |    |          |         |         |        |       |          |
| Original Model                                  |    |          |         |         |        |       |          |
| Contact with animals                            | 1  | 17.415   | 17.415  | -0.752  | 6.147  | 0.237 | 0.643    |
| Gender                                          | 1  | 213.168  | 213.168 | -12.700 | 7.242  | 2.907 | 0.139    |
| Age                                             | 1  | 8.540    | 8.540   | -4.570  | 13.375 | 0.116 | 0.745    |
| Smoke                                           | 1  | 40.743   | 40.743  | 0.478   | 8.736  | 0.556 | 0.484    |
| Married                                         | 1  | 13.107   | 13.107  | 9.894   | 8.760  | 0.179 | 0.687    |
| Spiritual                                       | 1  | 10.093   | 10.093  | -17.019 | 15.520 | 0.138 | 0.723    |
| Job                                             | 2  | 287.730  | 143.865 | 6.262   | 28.110 | 1.962 | 0.221    |
| Pets                                            | 1  | 159.538  | 159.538 | -19.278 | 13.142 | 2.176 | 0.191    |
| Months on the job                               | 1  | 59.667   | 59.667  | -0.023  | 0.094  | 0.814 | 0.402    |
| Total euthanasias/<br>harvest performed         | 1  | 4.398    | 4.398   | -6.017  | 5.603  | 0.060 | 0.815    |
| Average number<br>of euthanasias per<br>session | 1  | 204.220  | 204.220 | -0.609  | 0.282  | 2.785 | 0.146    |

|                                                 |    |           |          |         |         |       |         |
|-------------------------------------------------|----|-----------|----------|---------|---------|-------|---------|
| Frequency of euthanasia                         | 1  | 141.160   | 141.160  | 5.665   | 4.083   | 1.925 | 0.215   |
| Residuals                                       | 6  | 439.970   | 73.328   | NA      | NA      | NA    | NA      |
| Reduced Model                                   |    |           |          |         |         |       |         |
| Pets                                            | 1  | 330.980   | 330.980  | -11.197 | 4.804   | 5.433 | 0.029 * |
| Residuals                                       | 23 | 1401.260  | 60.920   | NA      | NA      | NA    | NA      |
| Difference in rMSSD                             |    |           |          |         |         |       |         |
| Original Model                                  |    |           |          |         |         |       |         |
| Contact with animals                            | 1  | 36.137    | 36.137   | -4.133  | 36.283  | 0.014 | 0.909   |
| Gender                                          | 1  | 2138.648  | 2138.648 | -28.437 | 45.547  | 0.852 | 0.398   |
| Age                                             | 1  | 236.756   | 236.756  | -32.685 | 99.878  | 0.094 | 0.771   |
| Smoke                                           | 1  | 2147.253  | 2147.253 | 68.695  | 56.483  | 0.855 | 0.397   |
| Married                                         | 1  | 1097.863  | 1097.863 | -34.836 | 55.138  | 0.437 | 0.538   |
| Spiritual                                       | 1  | 155.213   | 155.213  | -27.894 | 99.133  | 0.062 | 0.814   |
| Job                                             | 2  | 560.105   | 280.052  | -1.064  | 149.057 | 0.112 | 0.897   |
| Pets                                            | 1  | 7753.342  | 7753.342 | -48.045 | 92.654  | 3.089 | 0.139   |
| Months on the job                               | 1  | 2643.868  | 2643.868 | 0.278   | 0.600   | 1.053 | 0.352   |
| Total euthanasias/<br>harvest performed         | 1  | 1666.723  | 1666.723 | -33.525 | 30.748  | 0.664 | 0.452   |
| Average number<br>of euthanasias per<br>session | 1  | 25.128    | 25.128   | -0.986  | 2.025   | 0.010 | 0.924   |
| Frequency of euthanasia                         | 1  | 2490.667  | 2490.667 | 23.129  | 23.219  | 0.992 | 0.365   |
| Residuals                                       | 5  | 12549.970 | 2509.994 | NA      | NA      | NA    | NA      |
| Reduced Model                                   |    |           |          |         |         |       |         |
| None                                            |    |           |          |         |         |       |         |
| Difference in pNN50                             |    |           |          |         |         |       |         |
| Original Model                                  |    |           |          |         |         |       |         |
| Contact with animals                            | 1  | 61.529    | 61.529   | -1.703  | 4.281   | 1.761 | 0.242   |
| Gender                                          | 1  | 212.187   | 212.187  | -6.683  | 5.374   | 6.072 | 0.057   |
| Age                                             | 1  | 34.481    | 34.481   | 2.855   | 11.785  | 0.987 | 0.366   |
| Smoke                                           | 1  | 273.384   | 273.384  | 11.710  | 6.665   | 7.823 | 0.038 * |
| Married                                         | 1  | 0.461     | 0.461    | -3.153  | 6.506   | 0.013 | 0.913   |
| Spiritual                                       | 1  | 33.408    | 33.408   | -10.302 | 11.697  | 0.956 | 0.373   |
| Job                                             | 2  | 73.016    | 36.508   | -17.405 | 17.588  | 1.045 | 0.418   |
| Pets                                            | 1  | 341.989   | 341.989  | -18.542 | 10.933  | 9.786 | 0.026 * |
| Months on the job                               | 1  | 101.927   | 101.927  | 0.010   | 0.071   | 2.917 | 0.148   |
| Total euthanasias/<br>harvest performed         | 1  | 12.996    | 12.996   | -3.606  | 3.628   | 0.372 | 0.569   |
| Average number<br>of euthanasias per<br>session | 1  | 56.607    | 56.607   | -0.305  | 0.239   | 1.620 | 0.259   |

|                         |    |         |         |         |       |        |       |    |
|-------------------------|----|---------|---------|---------|-------|--------|-------|----|
| Frequency of euthanasia | 1  | 5.769   | 5.769   | 1.113   | 2.740 | 0.165  | 0.701 |    |
| Residuals               | 5  | 174.730 | 34.946  | NA      | NA    | NA     | NA    |    |
| Reduced Model           |    |         |         |         |       |        |       |    |
| Job                     | 2  | 322.173 | 161.087 | -10.313 | 3.164 | 3.842  | 0.042 | ** |
| Pets                    | 1  | 442.548 | 442.548 | -12.591 | 3.875 | 10.555 | 0.005 | ** |
| Residuals               | 17 | 712.769 | 41.928  | NA      | NA    | NA     | NA    |    |

Table S2. Experiment 2 Analysis.

| Variable                           | Df | Sum Sq   | Mean Sq | Estimate | Std. Error | F value | Pr(>F) | Significance |
|------------------------------------|----|----------|---------|----------|------------|---------|--------|--------------|
| <b>Burnout</b>                     |    |          |         |          |            |         |        |              |
| Original Model                     |    |          |         |          |            |         |        |              |
| Job                                | 2  | 75.886   | 37.943  | 0.926    | 4.498      | 1.422   | 0.267  |              |
| Gender                             | 1  | 31.056   | 31.056  | -0.640   | 2.331      | 1.164   | 0.295  |              |
| Age                                | 1  | 1.517    | 1.517   | 0.951    | 1.729      | 0.057   | 0.814  |              |
| Smoke                              | 1  | 0.262    | 0.262   | 1.445    | 2.601      | 0.010   | 0.922  |              |
| Married                            | 1  | 70.247   | 70.247  | -6.575   | 3.191      | 2.633   | 0.122  |              |
| Spiritual                          | 1  | 3.414    | 3.414   | 0.129    | 2.856      | 0.128   | 0.725  |              |
| Contact with animals               | 1  | 0.032    | 0.032   | 0.120    | 1.286      | 0.001   | 0.973  |              |
| Pets                               | 1  | 75.448   | 75.448  | 4.832    | 3.138      | 2.828   | 0.110  |              |
| Months on the job                  | 1  | 40.894   | 40.894  | 0.033    | 0.027      | 1.533   | 0.232  |              |
| Residuals                          | 18 | 480.210  | 26.678  | NA       | NA         | NA      | NA     |              |
| Reduced Model                      |    |          |         |          |            |         |        |              |
| None                               |    |          |         |          |            |         |        |              |
| <b>Moral injury</b>                |    |          |         |          |            |         |        |              |
| Original Model                     |    |          |         |          |            |         |        |              |
| Job                                | 2  | 44.537   | 22.269  | 2.827    | 8.626      | 0.227   | 0.799  |              |
| Gender                             | 1  | 7.167    | 7.167   | 0.392    | 4.471      | 0.073   | 0.790  |              |
| Age                                | 1  | 231.263  | 231.263 | -4.351   | 3.316      | 2.357   | 0.142  |              |
| Smoke                              | 1  | 14.777   | 14.777  | 0.749    | 4.987      | 0.151   | 0.703  |              |
| Married                            | 1  | 115.978  | 115.978 | 6.715    | 6.121      | 1.182   | 0.291  |              |
| Spiritual                          | 1  | 307.760  | 307.760 | -8.774   | 5.478      | 3.136   | 0.093  |              |
| Contact with animals               | 1  | 184.867  | 184.867 | 2.988    | 2.466      | 1.884   | 0.187  |              |
| Pets                               | 1  | 19.356   | 19.356  | -2.403   | 6.018      | 0.197   | 0.662  |              |
| Months on the job                  | 1  | 15.427   | 15.427  | -0.020   | 0.051      | 0.157   | 0.696  |              |
| Residuals                          | 18 | 1766.316 | 98.129  | NA       | NA         | NA      | NA     |              |
| Reduced Model                      |    |          |         |          |            |         |        |              |
| None                               |    |          |         |          |            |         |        |              |
| <b>Impact of event scale score</b> |    |          |         |          |            |         |        |              |
| Original Model                     |    |          |         |          |            |         |        |              |
| Job                                | 2  | 458.846  | 229.423 | 0.774    | 13.261     | 0.989   | 0.391  |              |
| Gender                             | 1  | 89.665   | 89.665  | 6.266    | 6.873      | 0.387   | 0.542  |              |
| Age                                | 1  | 31.640   | 31.640  | 3.540    | 5.099      | 0.136   | 0.716  |              |

|                                                           |    |          |          |         |       |        |          |
|-----------------------------------------------------------|----|----------|----------|---------|-------|--------|----------|
| Smoke                                                     | 1  | 148.336  | 148.336  | 0.644   | 7.668 | 0.640  | 0.434    |
| Married                                                   | 1  | 1180.079 | 1180.079 | -22.497 | 9.410 | 5.088  | 0.037 *  |
| Spiritual                                                 | 1  | 200.930  | 200.930  | 5.835   | 8.422 | 0.866  | 0.364    |
| Contact with animals                                      | 1  | 238.142  | 238.142  | -2.960  | 3.791 | 1.027  | 0.324    |
| Pets                                                      | 1  | 166.186  | 166.186  | 6.902   | 9.252 | 0.716  | 0.408    |
| Months on the job                                         | 1  | 186.059  | 186.059  | 0.071   | 0.079 | 0.802  | 0.382    |
| Residuals                                                 | 18 | 4175.083 | 231.949  | NA      | NA    | NA     | NA       |
| Reduced Model                                             |    |          |          |         |       |        |          |
| None                                                      |    |          |          |         |       |        |          |
| <b>Compassion satisfaction</b>                            |    |          |          |         |       |        |          |
| Original Model                                            |    |          |          |         |       |        |          |
| Job                                                       | 2  | 36.890   | 18.445   | -0.442  | 4.174 | 0.803  | 0.464    |
| Gender                                                    | 1  | 272.382  | 272.382  | 6.358   | 2.164 | 11.852 | 0.003 ** |
| Age                                                       | 1  | 5.327    | 5.327    | -0.095  | 1.605 | 0.232  | 0.636    |
| Smoke                                                     | 1  | 65.798   | 65.798   | 2.521   | 2.414 | 2.863  | 0.108    |
| Married                                                   | 1  | 11.200   | 11.200   | 3.757   | 2.962 | 0.487  | 0.494    |
| Spiritual                                                 | 1  | 58.737   | 58.737   | -3.524  | 2.651 | 2.556  | 0.127    |
| Contact with animals                                      | 1  | 55.696   | 55.696   | -1.518  | 1.193 | 2.423  | 0.137    |
| Pets                                                      | 1  | 123.048  | 123.048  | -6.482  | 2.912 | 5.354  | 0.033 *  |
| Months on the job                                         | 1  | 11.381   | 11.381   | -0.017  | 0.025 | 0.495  | 0.491    |
| Residuals                                                 | 18 | 413.679  | 22.982   | NA      | NA    | NA     | NA       |
| Reduced Model                                             |    |          |          |         |       |        |          |
| Gender                                                    | 1  | 214.520  | 214.524  | 5.284   | 1.75  | 9.701  | 0.005 ** |
| Married                                                   | 1  | 122.800  | 122.799  | 4.719   | 1.893 | 5.553  | 0.027 *  |
| Pets                                                      | 1  | 163.990  | 163.992  | -6.906  | 2.536 | 7.416  | 0.012 *  |
| Residuals                                                 | 25 | 552.820  | 22.113   | NA      | NA    | NA     | NA       |
| Secondary traumatic stress                                |    |          |          |         |       |        |          |
| Original Model                                            |    |          |          |         |       |        |          |
| Job                                                       | 2  | 48.772   | 24.386   | -0.925  | 5.703 | 0.569  | 0.576    |
| Gender                                                    | 1  | 0.508    | 0.508    | 1.306   | 2.956 | 0.012  | 0.915    |
| Age                                                       | 1  | 5.868    | 5.868    | 0.598   | 2.193 | 0.137  | 0.716    |
| Smoke                                                     | 1  | 0.116    | 0.116    | 0.504   | 3.297 | 0.003  | 0.959    |
| Married                                                   | 1  | 43.984   | 43.984   | -5.019  | 4.047 | 1.025  | 0.325    |
| Spiritual                                                 | 1  | 5.616    | 5.616    | 0.336   | 3.621 | 0.131  | 0.722    |
| Contact with animals                                      | 1  | 127.098  | 127.098  | -2.081  | 1.630 | 2.963  | 0.102    |
| Pets                                                      | 1  | 14.727   | 14.727   | 1.796   | 3.979 | 0.343  | 0.565    |
| Months on the job                                         | 1  | 64.720   | 64.720   | 0.042   | 0.034 | 1.509  | 0.235    |
| Residuals                                                 | 18 | 772.041  | 42.891   | NA      | NA    | NA     | NA       |
| Reduced Model                                             |    |          |          |         |       |        |          |
| None                                                      |    |          |          |         |       |        |          |
| PC1: rMSSD, pNN50, heart rate, and waking saliva cortisol |    |          |          |         |       |        |          |
| Original Model                                            |    |          |          |         |       |        |          |
| Job                                                       | 2  | 4.484    | 2.242    | -2.477  | 1.674 | 0.607  | 0.556    |
| Gender                                                    | 1  | 3.125    | 3.125    | -1.456  | 0.868 | 0.846  | 0.370    |

|                                            |    |        |        |        |       |       |       |
|--------------------------------------------|----|--------|--------|--------|-------|-------|-------|
| Age                                        | 1  | 1.710  | 1.710  | 0.783  | 0.644 | 0.463 | 0.505 |
| Smoke                                      | 1  | 14.594 | 14.594 | -1.730 | 0.968 | 3.950 | 0.062 |
| Married                                    | 1  | 0.483  | 0.483  | 0.627  | 1.188 | 0.131 | 0.722 |
| Spiritual                                  | 1  | 0.000  | 0.000  | -0.010 | 1.063 | 0.000 | 0.995 |
| Contact with animals                       | 1  | 0.055  | 0.055  | -0.225 | 0.478 | 0.015 | 0.905 |
| Pets                                       | 1  | 2.113  | 2.113  | 0.961  | 1.168 | 0.572 | 0.459 |
| Months on the job                          | 1  | 1.639  | 1.639  | -0.007 | 0.010 | 0.444 | 0.514 |
| Residuals                                  | 18 | 66.510 | 3.695  | NA     | NA    | NA    | NA    |
| Reduced Model<br>None                      |    |        |        |        |       |       |       |
| PC2: systolic and diastolic blood pressure |    |        |        |        |       |       |       |
| Original Model                             |    |        |        |        |       |       |       |
| Job                                        | 2  | 0.721  | 0.361  | -1.555 | 1.134 | 0.213 | 0.811 |
| Gender                                     | 1  | 0.041  | 0.041  | -0.200 | 0.588 | 0.024 | 0.879 |
| Age                                        | 1  | 0.058  | 0.058  | -0.250 | 0.436 | 0.034 | 0.855 |
| Smoke                                      | 1  | 1.574  | 1.574  | -0.109 | 0.656 | 0.928 | 0.348 |
| Married                                    | 1  | 3.903  | 3.903  | 1.249  | 0.805 | 2.301 | 0.147 |
| Spiritual                                  | 1  | 2.068  | 2.068  | 0.772  | 0.720 | 1.219 | 0.284 |
| Contact with animals                       | 1  | 4.567  | 4.567  | -0.451 | 0.324 | 2.692 | 0.118 |
| Pets                                       | 1  | 0.545  | 0.545  | -0.453 | 0.791 | 0.321 | 0.578 |
| Months on the job                          | 1  | 0.010  | 0.010  | 0.001  | 0.007 | 0.006 | 0.939 |
| Residuals                                  | 18 | 30.534 | 1.696  | NA     | NA    | NA    | NA    |
| Reduced Model<br>None                      |    |        |        |        |       |       |       |
